# Supplementary material for: A biocompatible Ni(ii) complex as an amyloid sensor for human PrP106–126 fibrillar aggregates
Source: Royal Society of Chemistry journal article supplement (doi:10.1039/d4cc04335a), 2024-12-23
Supplement: d4cc04335a1.pdf [file d4cc04335a1.pdf]

## Supplementary Information

### **Biocompatible Ni(II) Complex as an Amyloid Sensor for Human PrP<sub>106-126</sub> Fibrillar Aggregates**

Rajat Saini,<sup>[a]</sup> Rahul Chauhan,<sup>[a]</sup> Sain Singh,<sup>[a]</sup> Saakshi Saini,<sup>[b]</sup> Govinda R. Navale,<sup>[a]</sup> Abhishek Panwar,<sup>[c]</sup> Prashant Kukreti,<sup>[a]</sup> Imtiaz Ahmed,<sup>[a]</sup> Partha Roy,<sup>[b]</sup> and Kaushik Ghosh  
[a,b]\*

<sup>[a]</sup>Department of Chemistry, Indian Institute of Technology Roorkee, Roorkee, 247667, India.

<sup>[b]</sup>Department of Biosciences and Bioengineering, Indian Institute of Technology Roorkee, Roorkee, 247667, India.

<sup>[c]</sup>Department of Chemistry, National Institute of Technology Manipur, Langol-795004, Imphal West, Manipur, India

*E-mail:* [kaushik.ghosh@cy.iitr.ac.in](mailto:kaushik.ghosh@cy.iitr.ac.in) and [kg@bt.iitr.ac.in](mailto:kg@bt.iitr.ac.in)

## Table of Contents

|                                                                              |    |
|------------------------------------------------------------------------------|----|
| <i>Experimental details</i>                                                  | 3  |
| General synthesis                                                            | 3  |
| General characterization                                                     | 3  |
| <i>Synthesis schemes</i>                                                     | 3  |
| <i>X-ray crystallography, Crystal data, and refinement parameters</i>        | 5  |
| <i>Preparation of PrP<sub>106-126</sub> fibrils</i>                          | 12 |
| <i>Job's Plot Analysis</i>                                                   | 12 |
| <i>Benesi-Hildebrand Plot</i>                                                | 12 |
| <i>Evan's Method</i>                                                         | 13 |
| <i>Detection of PrP<sub>106-126</sub> aggregates in neuronal HT-22 cells</i> | 13 |
| <i>Molecular Docking</i>                                                     | 14 |
| <i>MALDI-TOF MS</i>                                                          | 14 |
| <i>Quantum Yield determination of KRS-1</i>                                  | 15 |
| <i>Supplementary Figures</i>                                                 | 16 |
| <i>References</i>                                                            | 29 |

## Experimental details

### General Synthesis

All chemicals used were of laboratory grade and purchased from Sigma-Aldrich (Merck) and were used without further purification. The reaction was monitored by thin-layer chromatography using reversed-phase aluminium TLC plates (Merck, TLC Silica gel RP-18 F254s).

### General Characterization

The medium used for all photophysical experiments was phosphate-buffered saline (PBS; pH 7.4). The concentrated stock solution (5 mM) was prepared in DMSO (Molecular Biology grade, Sigma Aldrich) and diluted to the required concentration in PBS for further experiments. In every experiment, the DMSO concentration was 0.5% volume/volume. The UV-Vis spectra were recorded using a Shimadzu UV-2600 spectrophotometer. The fluorescence spectra were recorded using a Synergy Biotek Citation 3 multi-mode plate reader and a Horiba fluorescence spectrophotometer.

### Synthesis schemes

#### Synthesis of diformyl precursor of 4-tertbutyl phenol

The synthesis of diformyl precursor of 4-tertbutyl phenol was performed by the reported procedure.<sup>1</sup>

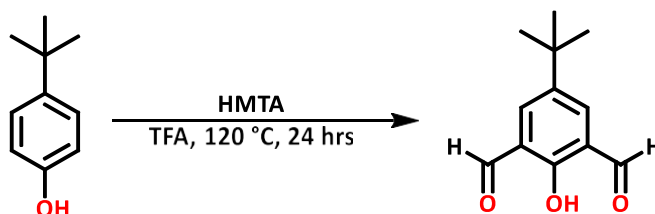

#### Synthesis of Bis-Benzothiazole based ligand (HL)

The Bis-Benzothiazole ligand has been synthesized in the literature.<sup>2</sup> However, we utilized a more facile and unique method to synthesize this ligand. The Bis-Benzothiazole-based ligand (HL) was synthesized by a one-pot 2:1 condensation reaction of 2-aminothiophenol with 4-tertbutyl-2,6-diformylphenol in dimethyl sulphoxide (which acts as both solvent and oxidizing agent). To a Round Bottom (RB) flask, 100 mg (0.4854 millimoles) of diformyl precursor and

121.53 mg (0.9708 millimoles) of 2-aminothiophenol were added in 25 mL of dimethylsulphoxide and refluxed at 110°C for 3 hours. The orange crystalline solid appeared in the reaction mixture and was filtered and cooled to room temperature. Yield (92%), Melting point (245°C). The ligand was characterized by FT-IR, UV-visible, and NMR. IR data (KBr,  $\nu$   $\text{cm}^{-1}$ ): ~3,445  $\nu(\text{OH})$ , 3,058  $\nu(\text{C-H}_{\text{aromatic}})$ , 2,931  $\nu(\text{C-H}_{\text{aliphatic}})$ , 1,631  $\nu(\text{C=N}_{\text{thiazole}})$ , 1,475  $\nu(\text{C=C})$ , 1,111  $\nu(\text{C-O}_{\text{phenolic}})$ , 756  $\nu(\text{C-S-C})$ .  $^1\text{H}$  NMR (300 MHz,  $\text{CDCl}_3$ ):  $\delta$  = 14.03 (bs, 1H, OH), 8.31 (bs, 2H, Ar-H), 8.12 (d,  $J$  = 7.9 Hz 2H, Ar-H), 7.9 (d,  $J$  = 7.0 Hz, 2H, Ar-H), 7.56 (dt,  $J$  = 7.0 Hz, 2H, Ar-H), 7.45 (dt,  $J$  = 7.9 Hz, 2H, Ar-H), 1.50 (s, 9H, *tert*-but) ppm.

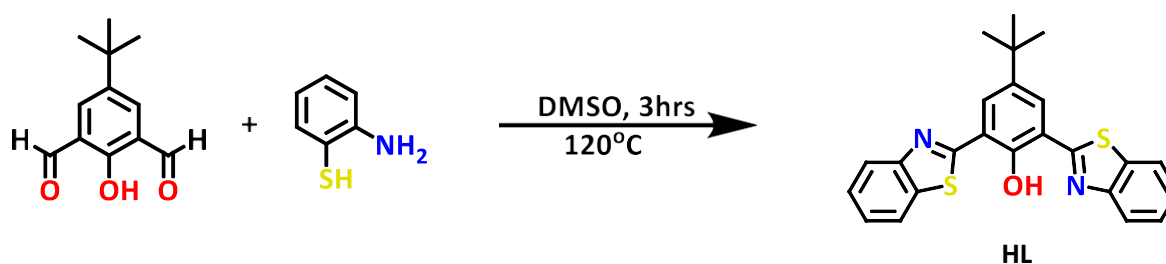

### Synthesis of Ni(II) complex (KRS-1)

For the synthesis of the complex, 100 mg (0.24 millimoles) of ligand (HL) was dissolved in dichloromethane and stirred at room temperature. 35  $\mu\text{L}$  of triethylamine was also added to it. After 10 min of stirring, 26.45 mg (0.12 millimoles) of  $\text{Ni}(\text{OAc})_2 \cdot 4\text{H}_2\text{O}$  dissolved in methanol was added dropwise to the above solution in dichloromethane. The yellow precipitate obtained after stirring for about 5 hours was collected by filtration. In order to remove any impurities, it was further dissolved in N, N-dimethylformamide, and diethyl ether was added to this solution to again precipitate out the pure complex and it was again obtained by filtration and washed with diethyl ether. Yield (87%). Anal. Calcd. for Chemical Formula:  $\text{C}_{54}\text{H}_{52}\text{N}_6\text{NiO}_4\text{S}_4$  (MW = 1034.2286): C, 62.61; H, 5.06; N, 8.11; S, 12.38. Found: C, 62.41; H, 5.13; N, 8.07; S, 12.27.

The Ni(II) complex was characterized by FT-IR, UV-visible, MALDI-TOF MS, and X-ray crystallography.

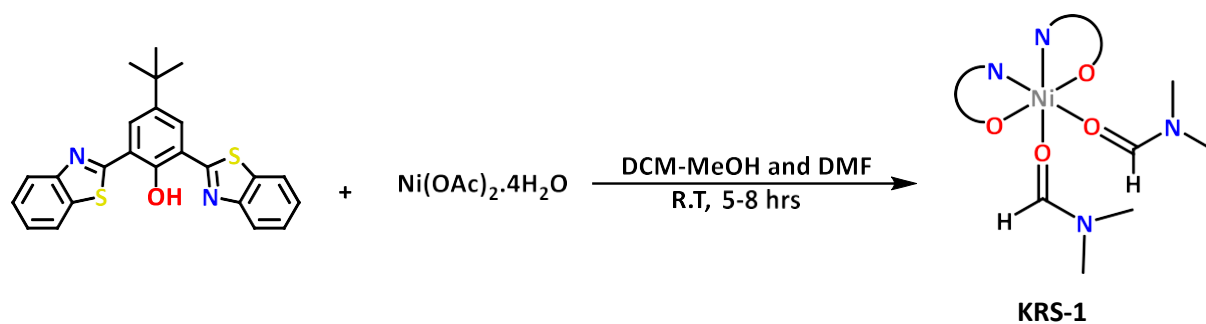

### X-ray crystallography:

The pale-yellow crystals of the complex **KRS-1** were produced in DMF solvent using a slow evaporation process. The crystal data was collected and processed on a Bruker D8 Quest Diffractometer with a CMOS detector utilizing graphite monochromated Mo-K $\alpha$  radiation ( $\lambda = 0.71073 \text{ \AA}$ ) at 100 K. Crystal structures were solved using direct methods. The SHELXTL program was used to solve structure problems, refine them, and produce data.<sup>3,4</sup> All non-hydrogen atoms were polished anisotropically. ORTEP diagrams were generated with the MERCURY 3.10.3 software.<sup>5</sup>

### Crystal data and structural refinement parameters for complex KRS-1:

|                                       |                                                                                                 |
|---------------------------------------|-------------------------------------------------------------------------------------------------|
| Empirical formula                     | C <sub>108</sub> H <sub>103</sub> N <sub>12</sub> Ni <sub>2</sub> O <sub>8</sub> S <sub>8</sub> |
| Formula weight                        | 2070.92                                                                                         |
| Temperature/K                         | 100                                                                                             |
| Crystal system                        | triclinic                                                                                       |
| Space group                           | P-1                                                                                             |
| a/ $\text{\AA}$                       | 13.4171(6)                                                                                      |
| b/ $\text{\AA}$                       | 15.9626(8)                                                                                      |
| c/ $\text{\AA}$                       | 26.6148(12)                                                                                     |
| $\alpha$ / $^\circ$                   | 89.9910(10)                                                                                     |
| $\beta$ / $^\circ$                    | 89.9890(10)                                                                                     |
| $\gamma$ / $^\circ$                   | 103.0520(10)                                                                                    |
| Volume/ $\text{\AA}^3$                | 5552.9(4)                                                                                       |
| Z                                     | 2                                                                                               |
| $\rho_{\text{calc}}$ /cm <sup>3</sup> | 1.239                                                                                           |
| $\mu$ /mm <sup>-1</sup>               | 0.547                                                                                           |
| F(000)                                | 2166                                                                                            |
| Crystal size/mm <sup>3</sup>          | 0.303 × 0.14 × 0.04                                                                             |

|                                                |                                                                              |
|------------------------------------------------|------------------------------------------------------------------------------|
| Radiation                                      | MoK $\alpha$ ( $\lambda = 0.71073$ )                                         |
| 2 $\theta$ range for data collection/ $^\circ$ | 2.618 to 52.716                                                              |
| Index ranges                                   | -16 $\leq$ h $\leq$ 16,<br>-19 $\leq$ k $\leq$ 19,<br>-33 $\leq$ l $\leq$ 33 |
| Reflections collected                          | 252512                                                                       |
| Independent reflections                        | 22595<br>[R <sub>int</sub> = 0.0510, R <sub>sigma</sub> = 0.0262]            |
| Data/restraints/parameters                     | 22595/0/1262                                                                 |
| Goodness-of-fit on F <sup>2</sup>              | 1.049                                                                        |
| Final R indexes [ $I > 2\sigma(I)$ ]           | R <sub>1</sub> = 0.0349, wR <sub>2</sub> = 0.0951                            |
| Final R indexes [all data]                     | R <sub>1</sub> = 0.0412, wR <sub>2</sub> = 0.0996                            |
| Largest diff. peak/hole / e $\text{\AA}^{-3}$  | 0.56/-0.40                                                                   |

**Table 1:** Summary of crystal data and data-collection parameters of complex KRS-1

| Atom | Atom | Length/ $\text{\AA}$ |
|------|------|----------------------|
| Ni1  | O1   | 2.0295(13)           |
| Ni1  | O2   | 2.0044(13)           |
| Ni1  | O3   | 2.0879(13)           |
| Ni1  | O4   | 2.1122(13)           |
| Ni1  | N2   | 2.0873(15)           |
| Ni1  | N3   | 2.0820(15)           |
| Ni2  | O5   | 2.0293(12)           |
| Ni2  | O6   | 2.0048(13)           |
| Ni2  | O7   | 2.0888(13)           |
| Ni2  | O8   | 2.1105(13)           |
| Ni2  | N7   | 2.0820(15)           |
| Ni2  | N8   | 2.0891(15)           |
| S1   | C1   | 1.7322(19)           |
| S1   | C7   | 1.7631(19)           |
| S2   | C16  | 1.7596(18)           |
| S2   | C17  | 1.7373(19)           |
| S3   | C19  | 1.7619(18)           |
| S3   | C20  | 1.7338(18)           |
| S4   | C43  | 1.7628(18)           |

| Atom | Atom | Length/ $\text{\AA}$ |
|------|------|----------------------|
| C14  | C22  | 1.541(3)             |
| C14  | C23  | 1.527(3)             |
| C17  | C18  | 1.399(3)             |
| C17  | C24  | 1.396(2)             |
| C18  | C27  | 1.402(3)             |
| C19  | C33  | 1.453(3)             |
| C20  | C21  | 1.407(2)             |
| C20  | C39  | 1.395(3)             |
| C21  | C40  | 1.395(3)             |
| C24  | C25  | 1.377(3)             |
| C25  | C26  | 1.398(3)             |
| C26  | C27  | 1.385(3)             |
| C28  | C29  | 1.423(3)             |
| C28  | C33  | 1.432(2)             |
| C29  | C30  | 1.388(3)             |
| C29  | C43  | 1.465(2)             |
| C30  | C31  | 1.398(2)             |
| C31  | C32  | 1.389(3)             |
| C31  | C46  | 1.533(2)             |

|     |      |            |
|-----|------|------------|
| S4  | C44  | 1.7331(19) |
| S5  | C56  | 1.7350(18) |
| S5  | C62  | 1.7621(19) |
| S6  | C70  | 1.7320(18) |
| S6  | C71  | 1.7597(17) |
| S7  | C72  | 1.7595(18) |
| S7  | C74  | 1.7372(19) |
| S8  | C100 | 1.7642(18) |
| S8  | C102 | 1.732(2)   |
| O1  | C13  | 1.300(2)   |
| O2  | C28  | 1.297(2)   |
| O3  | C34  | 1.238(2)   |
| O4  | C37  | 1.244(2)   |
| O5  | C64  | 1.299(2)   |
| O6  | C77  | 1.295(2)   |
| O7  | C83  | 1.235(2)   |
| O8  | C86  | 1.243(2)   |
| N1  | C6   | 1.391(2)   |
| N1  | C7   | 1.309(2)   |
| N2  | C16  | 1.312(2)   |
| N2  | C18  | 1.397(2)   |
| N3  | C19  | 1.315(2)   |
| N3  | C21  | 1.398(2)   |
| N4  | C37  | 1.324(2)   |
| N4  | C38  | 1.448(3)   |
| N4  | C49  | 1.453(3)   |
| N5  | C43  | 1.305(2)   |
| N5  | C45  | 1.385(2)   |
| N6  | C57  | 1.392(2)   |
| N6  | C62  | 1.311(2)   |
| N7  | C69  | 1.397(2)   |
| N7  | C71  | 1.318(2)   |
| N8  | C72  | 1.312(2)   |
| N8  | C73  | 1.397(2)   |
| N9  | C86  | 1.327(2)   |
| N9  | C87  | 1.448(3)   |
| N9  | C104 | 1.452(3)   |
| N10 | C100 | 1.304(2)   |
| N10 | C101 | 1.386(2)   |
| N17 | C34  | 1.315(3)   |
| N17 | C36  | 1.434(3)   |

|     |     |          |
|-----|-----|----------|
| C32 | C33 | 1.405(3) |
| C39 | C42 | 1.379(3) |
| C40 | C41 | 1.381(3) |
| C41 | C42 | 1.403(3) |
| C44 | C45 | 1.406(3) |
| C44 | C50 | 1.393(3) |
| C45 | C53 | 1.398(3) |
| C46 | C47 | 1.529(2) |
| C46 | C54 | 1.533(3) |
| C46 | C55 | 1.542(3) |
| C50 | C51 | 1.376(3) |
| C51 | C52 | 1.395(4) |
| C52 | C53 | 1.387(3) |
| C56 | C57 | 1.398(3) |
| C56 | C61 | 1.399(3) |
| C57 | C58 | 1.406(3) |
| C58 | C59 | 1.385(3) |
| C59 | C60 | 1.393(3) |
| C60 | C61 | 1.384(3) |
| C62 | C63 | 1.465(2) |
| C63 | C64 | 1.425(2) |
| C63 | C68 | 1.395(3) |
| C64 | C65 | 1.434(2) |
| C65 | C66 | 1.392(3) |
| C65 | C72 | 1.459(2) |
| C66 | C67 | 1.396(3) |
| C67 | C68 | 1.391(3) |
| C67 | C75 | 1.539(3) |
| C69 | C70 | 1.408(2) |
| C69 | C88 | 1.397(3) |
| C70 | C91 | 1.397(3) |
| C71 | C78 | 1.454(2) |
| C73 | C74 | 1.397(2) |
| C73 | C92 | 1.402(3) |
| C74 | C95 | 1.399(2) |
| C75 | C76 | 1.540(3) |
| C75 | C96 | 1.528(3) |
| C75 | C97 | 1.533(3) |
| C77 | C78 | 1.432(2) |
| C77 | C82 | 1.423(3) |
| C78 | C79 | 1.404(2) |

|     |      |          |
|-----|------|----------|
| N17 | C48  | 1.457(3) |
| N18 | C83  | 1.315(3) |
| N18 | C85  | 1.435(3) |
| N18 | C103 | 1.461(3) |
| C1  | C2   | 1.401(3) |
| C1  | C6   | 1.397(3) |
| C2  | C3   | 1.384(3) |
| C3  | C4   | 1.392(3) |
| C4  | C5   | 1.385(3) |
| C5  | C6   | 1.404(3) |
| C7  | C8   | 1.465(2) |
| C8  | C9   | 1.396(3) |
| C8  | C13  | 1.424(3) |
| C9  | C10  | 1.393(3) |
| C10 | C11  | 1.399(3) |
| C10 | C14  | 1.536(3) |
| C11 | C12  | 1.393(3) |
| C12 | C13  | 1.432(2) |
| C12 | C16  | 1.460(3) |
| C14 | C15  | 1.529(3) |

|      |      |          |
|------|------|----------|
| C79  | C80  | 1.389(3) |
| C80  | C81  | 1.398(2) |
| C80  | C98  | 1.532(2) |
| C81  | C82  | 1.388(3) |
| C82  | C100 | 1.464(2) |
| C88  | C89  | 1.384(3) |
| C89  | C90  | 1.402(3) |
| C90  | C91  | 1.382(3) |
| C92  | C93  | 1.383(2) |
| C93  | C94  | 1.395(3) |
| C94  | C95  | 1.381(3) |
| C98  | C99  | 1.531(2) |
| C98  | C105 | 1.540(3) |
| C98  | C106 | 1.537(3) |
| C101 | C102 | 1.408(3) |
| C101 | C107 | 1.400(3) |
| C102 | C110 | 1.396(3) |
| C107 | C108 | 1.382(3) |
| C108 | C109 | 1.395(4) |
| C109 | C110 | 1.377(3) |

**Table 2:** Bond Lengths for complex KRS-1.

| Atom | Atom | Atom | Angle/°   |
|------|------|------|-----------|
| O1   | Ni1  | O3   | 90.51(5)  |
| O1   | Ni1  | O4   | 176.94(5) |
| O1   | Ni1  | N2   | 84.61(5)  |
| O1   | Ni1  | N3   | 89.88(5)  |
| O2   | Ni1  | O1   | 95.67(5)  |
| O2   | Ni1  | O3   | 171.97(5) |
| O2   | Ni1  | O4   | 87.21(5)  |
| O2   | Ni1  | N2   | 88.53(6)  |
| O2   | Ni1  | N3   | 85.64(5)  |
| O3   | Ni1  | O4   | 86.53(5)  |
| N2   | Ni1  | O3   | 86.94(6)  |
| N2   | Ni1  | O4   | 94.45(5)  |
| N3   | Ni1  | O3   | 99.54(5)  |
| N3   | Ni1  | O4   | 91.38(5)  |

| Atom | Atom | Atom | Angle/°    |
|------|------|------|------------|
| C29  | C28  | C33  | 116.81(16) |
| C28  | C29  | C43  | 120.49(16) |
| C30  | C29  | C28  | 120.63(16) |
| C30  | C29  | C43  | 118.88(16) |
| C29  | C30  | C31  | 122.60(17) |
| C30  | C31  | C46  | 119.12(16) |
| C32  | C31  | C30  | 117.02(16) |
| C32  | C31  | C46  | 123.86(16) |
| C31  | C32  | C33  | 122.52(16) |
| C28  | C33  | C19  | 119.27(16) |
| C32  | C33  | C19  | 120.62(16) |
| C32  | C33  | C28  | 119.90(16) |
| O3   | C34  | N17  | 124.5(2)   |
| O4   | C37  | N4   | 124.60(18) |



|      |     |      |            |
|------|-----|------|------------|
| N3   | Ni1 | N2   | 171.55(6)  |
| O5   | Ni2 | O7   | 90.49(5)   |
| O5   | Ni2 | O8   | 176.91(5)  |
| O5   | Ni2 | N7   | 89.93(5)   |
| O5   | Ni2 | N8   | 84.58(5)   |
| O6   | Ni2 | O5   | 95.60(5)   |
| O6   | Ni2 | O7   | 172.04(5)  |
| O6   | Ni2 | O8   | 87.29(5)   |
| O6   | Ni2 | N7   | 85.63(5)   |
| O6   | Ni2 | N8   | 88.52(6)   |
| O7   | Ni2 | O8   | 86.53(5)   |
| O7   | Ni2 | N8   | 86.95(6)   |
| N7   | Ni2 | O7   | 99.53(5)   |
| N7   | Ni2 | O8   | 91.39(5)   |
| N7   | Ni2 | N8   | 171.56(6)  |
| N8   | Ni2 | O8   | 94.41(5)   |
| C1   | S1  | C7   | 89.09(9)   |
| C17  | S2  | C16  | 89.54(9)   |
| C20  | S3  | C19  | 90.05(9)   |
| C44  | S4  | C43  | 88.77(9)   |
| C56  | S5  | C62  | 89.21(9)   |
| C70  | S6  | C71  | 90.08(8)   |
| C74  | S7  | C72  | 89.50(9)   |
| C102 | S8  | C100 | 88.92(9)   |
| C13  | O1  | Ni1  | 117.83(11) |
| C28  | O2  | Ni1  | 124.21(11) |
| C34  | O3  | Ni1  | 120.91(13) |
| C37  | O4  | Ni1  | 119.72(12) |
| C64  | O5  | Ni2  | 117.95(11) |
| C77  | O6  | Ni2  | 124.27(11) |
| C83  | O7  | Ni2  | 120.92(13) |
| C86  | O8  | Ni2  | 119.73(12) |
| C7   | N1  | C6   | 111.10(16) |
| C16  | N2  | Ni1  | 119.75(12) |
| C16  | N2  | C18  | 111.91(15) |
| C18  | N2  | Ni1  | 127.03(12) |
| C19  | N3  | Ni1  | 120.95(12) |
| C19  | N3  | C21  | 111.93(15) |
| C21  | N3  | Ni1  | 127.11(12) |
| C37  | N4  | C38  | 121.34(17) |
| C37  | N4  | C49  | 120.94(18) |

|     |     |     |            |
|-----|-----|-----|------------|
| C42 | C39 | C20 | 117.89(17) |
| C41 | C40 | C21 | 118.72(17) |
| C40 | C41 | C42 | 120.88(17) |
| C39 | C42 | C41 | 121.29(17) |
| N5  | C43 | S4  | 115.53(14) |
| N5  | C43 | C29 | 122.63(17) |
| C29 | C43 | S4  | 121.81(14) |
| C45 | C44 | S4  | 109.72(14) |
| C50 | C44 | S4  | 128.59(17) |
| C50 | C44 | C45 | 121.69(19) |
| N5  | C45 | C44 | 115.09(17) |
| N5  | C45 | C53 | 125.48(19) |
| C53 | C45 | C44 | 119.42(18) |
| C31 | C46 | C54 | 109.99(15) |
| C31 | C46 | C55 | 108.69(15) |
| C47 | C46 | C31 | 111.82(15) |
| C47 | C46 | C54 | 107.87(15) |
| C47 | C46 | C55 | 108.73(15) |
| C54 | C46 | C55 | 109.72(16) |
| C51 | C50 | C44 | 117.9(2)   |
| C50 | C51 | C52 | 121.4(2)   |
| C53 | C52 | C51 | 121.0(2)   |
| C52 | C53 | C45 | 118.7(2)   |
| C57 | C56 | S5  | 109.68(14) |
| C57 | C56 | C61 | 121.71(18) |
| C61 | C56 | S5  | 128.60(16) |
| N6  | C57 | C56 | 115.21(16) |
| N6  | C57 | C58 | 125.41(19) |
| C56 | C57 | C58 | 119.38(18) |
| C59 | C58 | C57 | 118.6(2)   |
| C58 | C59 | C60 | 121.52(18) |
| C61 | C60 | C59 | 120.71(19) |
| C60 | C61 | C56 | 118.1(2)   |
| N6  | C62 | S5  | 114.97(14) |
| N6  | C62 | C63 | 123.76(17) |
| C63 | C62 | S5  | 121.26(14) |
| C64 | C63 | C62 | 119.45(17) |
| C68 | C63 | C62 | 119.60(16) |
| C68 | C63 | C64 | 120.88(16) |
| O5  | C64 | C63 | 120.48(16) |
| O5  | C64 | C65 | 122.66(16) |

|      |     |      |            |
|------|-----|------|------------|
| C38  | N4  | C49  | 117.56(18) |
| C43  | N5  | C45  | 110.83(16) |
| C62  | N6  | C57  | 110.93(16) |
| C69  | N7  | Ni2  | 127.17(11) |
| C71  | N7  | Ni2  | 120.98(12) |
| C71  | N7  | C69  | 111.84(15) |
| C72  | N8  | Ni2  | 119.70(12) |
| C72  | N8  | C73  | 112.05(15) |
| C73  | N8  | Ni2  | 126.93(12) |
| C86  | N9  | C87  | 121.41(18) |
| C86  | N9  | C104 | 120.96(18) |
| C87  | N9  | C104 | 117.47(18) |
| C100 | N10 | C101 | 110.90(16) |
| C34  | N17 | C36  | 120.8(2)   |
| C34  | N17 | C48  | 122.1(2)   |
| C36  | N17 | C48  | 117.1(2)   |
| C83  | N18 | C85  | 120.8(2)   |
| C83  | N18 | C103 | 122.3(2)   |
| C85  | N18 | C103 | 116.9(2)   |
| C2   | C1  | S1   | 128.54(17) |
| C6   | C1  | S1   | 109.94(14) |
| C6   | C1  | C2   | 121.51(18) |
| C3   | C2  | C1   | 118.1(2)   |
| C2   | C3  | C4   | 120.78(19) |
| C5   | C4  | C3   | 121.42(19) |
| C4   | C5  | C6   | 118.6(2)   |
| N1   | C6  | C1   | 114.96(16) |
| N1   | C6  | C5   | 125.47(19) |
| C1   | C6  | C5   | 119.58(18) |
| N1   | C7  | S1   | 114.91(14) |
| N1   | C7  | C8   | 123.91(17) |
| C8   | C7  | S1   | 121.17(14) |
| C9   | C8  | C7   | 119.60(16) |
| C9   | C8  | C13  | 120.74(16) |
| C13  | C8  | C7   | 119.57(17) |
| C10  | C9  | C8   | 122.53(17) |
| C9   | C10 | C11  | 116.61(17) |
| C9   | C10 | C14  | 124.37(17) |
| C11  | C10 | C14  | 119.00(16) |
| C12  | C11 | C10  | 123.29(17) |
| C11  | C12 | C13  | 119.82(17) |

|     |     |     |            |
|-----|-----|-----|------------|
| C63 | C64 | C65 | 116.86(17) |
| C64 | C65 | C72 | 120.50(17) |
| C66 | C65 | C64 | 119.76(16) |
| C66 | C65 | C72 | 119.72(16) |
| C65 | C66 | C67 | 123.20(17) |
| C66 | C67 | C75 | 118.82(16) |
| C68 | C67 | C66 | 116.97(17) |
| C68 | C67 | C75 | 124.19(17) |
| C67 | C68 | C63 | 122.27(17) |
| N7  | C69 | C70 | 114.43(15) |
| C88 | C69 | N7  | 125.43(16) |
| C88 | C69 | C70 | 120.07(16) |
| C69 | C70 | S6  | 109.60(13) |
| C91 | C70 | S6  | 129.05(14) |
| C91 | C70 | C69 | 121.24(17) |
| N7  | C71 | S6  | 114.03(13) |
| N7  | C71 | C78 | 127.31(16) |
| C78 | C71 | S6  | 118.42(13) |
| N8  | C72 | S7  | 114.18(13) |
| N8  | C72 | C65 | 126.12(16) |
| C65 | C72 | S7  | 119.69(14) |
| N8  | C73 | C92 | 126.17(16) |
| C74 | C73 | N8  | 114.14(16) |
| C74 | C73 | C92 | 119.68(16) |
| C73 | C74 | S7  | 110.05(13) |
| C73 | C74 | C95 | 121.63(18) |
| C95 | C74 | S7  | 128.29(15) |
| C67 | C75 | C76 | 108.52(16) |
| C96 | C75 | C67 | 110.12(17) |
| C96 | C75 | C76 | 109.35(18) |
| C96 | C75 | C97 | 108.75(17) |
| C97 | C75 | C67 | 111.88(16) |
| C97 | C75 | C76 | 108.18(17) |
| O6  | C77 | C78 | 123.36(16) |
| O6  | C77 | C82 | 119.89(15) |
| C82 | C77 | C78 | 116.72(16) |
| C77 | C78 | C71 | 119.19(16) |
| C79 | C78 | C71 | 120.54(15) |
| C79 | C78 | C77 | 120.06(16) |
| C80 | C79 | C78 | 122.43(16) |
| C79 | C80 | C81 | 117.03(16) |

|     |     |     |            |
|-----|-----|-----|------------|
| C11 | C12 | C16 | 119.62(16) |
| C13 | C12 | C16 | 120.55(17) |
| O1  | C13 | C8  | 120.33(16) |
| O1  | C13 | C12 | 122.72(16) |
| C8  | C13 | C12 | 116.95(16) |
| C10 | C14 | C22 | 108.43(16) |
| C15 | C14 | C10 | 111.89(16) |
| C15 | C14 | C22 | 108.29(17) |
| C23 | C14 | C10 | 110.08(17) |
| C23 | C14 | C15 | 108.70(17) |
| C23 | C14 | C22 | 109.41(18) |
| N2  | C16 | S2  | 114.26(13) |
| N2  | C16 | C12 | 126.01(16) |
| C12 | C16 | S2  | 119.72(14) |
| C18 | C17 | S2  | 109.91(13) |
| C24 | C17 | S2  | 128.49(15) |
| C24 | C17 | C18 | 121.57(18) |
| N2  | C18 | C17 | 114.30(16) |
| N2  | C18 | C27 | 125.98(16) |
| C17 | C18 | C27 | 119.72(16) |
| N3  | C19 | S3  | 113.98(13) |
| N3  | C19 | C33 | 127.41(16) |
| C33 | C19 | S3  | 118.36(13) |
| C21 | C20 | S3  | 109.56(13) |
| C39 | C20 | S3  | 129.03(14) |
| C39 | C20 | C21 | 121.30(17) |
| N3  | C21 | C20 | 114.47(16) |
| C40 | C21 | N3  | 125.55(16) |
| C40 | C21 | C20 | 119.91(16) |
| C25 | C24 | C17 | 118.23(17) |
| C24 | C25 | C26 | 120.65(17) |
| C27 | C26 | C25 | 121.56(19) |
| C26 | C27 | C18 | 118.23(17) |
| O2  | C28 | C29 | 119.93(16) |
| O2  | C28 | C33 | 123.22(16) |

|      |      |      |            |
|------|------|------|------------|
| C79  | C80  | C98  | 123.77(15) |
| C81  | C80  | C98  | 119.19(16) |
| C82  | C81  | C80  | 122.67(17) |
| C77  | C82  | C100 | 120.45(16) |
| C81  | C82  | C77  | 120.59(16) |
| C81  | C82  | C100 | 118.94(16) |
| O7   | C83  | N18  | 124.6(2)   |
| O8   | C86  | N9   | 124.60(18) |
| C89  | C88  | C69  | 118.53(17) |
| C88  | C89  | C90  | 120.97(17) |
| C91  | C90  | C89  | 121.31(17) |
| C90  | C91  | C70  | 117.86(17) |
| C93  | C92  | C73  | 118.25(18) |
| C92  | C93  | C94  | 121.77(18) |
| C95  | C94  | C93  | 120.56(17) |
| C94  | C95  | C74  | 118.06(17) |
| C80  | C98  | C105 | 108.76(14) |
| C80  | C98  | C106 | 109.93(15) |
| C99  | C98  | C80  | 111.80(15) |
| C99  | C98  | C105 | 109.00(15) |
| C99  | C98  | C106 | 107.87(15) |
| C106 | C98  | C105 | 109.45(16) |
| N10  | C100 | S8   | 115.41(13) |
| N10  | C100 | C82  | 122.68(16) |
| C82  | C100 | S8   | 121.88(14) |
| N10  | C101 | C102 | 115.10(17) |
| N10  | C101 | C107 | 125.50(19) |
| C107 | C101 | C102 | 119.40(18) |
| C101 | C102 | S8   | 109.62(14) |
| C110 | C102 | S8   | 128.72(17) |
| C110 | C102 | C101 | 121.66(19) |
| C108 | C107 | C101 | 118.6(2)   |
| C107 | C108 | C109 | 121.3(2)   |
| C110 | C109 | C108 | 121.32(19) |
| C109 | C110 | C102 | 117.8(2)   |

**Table 3:** Bond Angles for complex KRS-1.

### Preparation of PrP<sub>106-126</sub> fibrils:

The PrP<sub>106-126</sub> fibrillar aggregates were prepared as per earlier reports.<sup>6</sup> Frozen PrP<sub>106-126</sub> peptides were dissolved in 500 µL of 1,1,1,3,3,3-hexafluoro-2-propanol (HFIP) to disrupt any trace of preformed aggregates. The peptide solution was kept overnight, peptide aliquots were prepared, and HFIP was evaporated by passing N<sub>2</sub> gas and PrP<sub>106-126</sub> peptide stored at -80 °C. The final stock solutions of PrP<sub>106-126</sub> (monomeric) were prepared by dissolving peptides in molecular grade DMSO at a final conc. of 1 mM. The ThT-fluorescence assay was used to observe the formation of PrP<sub>106-126</sub> soluble aggregates. The 100 µM of final peptide concentrations were made by diluting the 1 mM stock solution of PrP<sub>106-126</sub> peptide in 10 mM phosphate buffer (pH 7.4), incubated at 37 °C for 24 h in a 96-well microtiter plate (200 µL total volume).

### Job's Plot Analysis:<sup>7</sup>

PrP<sub>106-126</sub> fibrils were prepared as described earlier. These PrP<sub>106-126</sub> fibrils were then diluted to a final concentration of 10, 20, 30, 40, 50, 60, 70, 80, 90, and 100 µM. Photoluminescence was observed by varying the **KRS-1** and peptide ratio with fixed total concentration (**KRS-1** + PrP<sub>106-126</sub> fibrils) of 100 µM. The molar ratio of **KRS-1** is defined as the moles of **KRS-1** divided by the total moles in the solution, that is, **KRS-1** + PrP<sub>106-126</sub> fibrils.

### Benesi-Hildebrand Plot:<sup>8</sup>

**By UV-visible:** Binding constant (K) between Ni<sup>2+</sup> and ligand (HL) was calculated according to the Benesi-Hildebrand equation as stated below.

$$\log \frac{A - A_{min}}{A_{max} - A} = \log K + n \log [Ni^{2+}]$$

Where, A = absorbance intensity of ligand (HL) obtained with Ni<sup>2+</sup> ions; A<sub>min</sub> = absorbance intensity of ligand (HL) only; A<sub>max</sub> = absorbance intensity of ligand (HL) in the presence of Ni<sup>2+</sup> ions, the stoichiometry (n) was found to be 0.57 and the binding constant (K) was found to be 1.79 × 10<sup>12</sup> M<sup>-2</sup>.

**By fluorescence:** The binding constant value between KRS-1 and PrP<sub>106-126</sub> was calculated using the Benesi-Hildebrand equation as stated below.

$$\frac{1}{F - F_o} = \frac{1}{K^{0.5}(F_{max} - F_o)[Ni^{2+}]^{0.5}} + \frac{1}{F_{max} - F_o}$$

Where, F = emission intensity at a particular concentration of KRS-1; F<sub>o</sub> = emission intensity of PrP only; F<sub>max</sub> = maximum emission intensity observed in the presence of KRS-1. The binding constant (K) was found to be 2.05 × 10<sup>6</sup> M<sup>-2</sup>.

### Evan's Method:<sup>9,10</sup>

A 500 µL solution of **KRS-1** containing HMDS (internal standard) in DMSO-d<sub>6</sub> was taken in a

Wilmad screw-cap NMR tube. HMDS in DMSO- $d_6$  was taken in Wilmad coaxial insert stem, and the tube was carefully inserted inside the screw-cap NMR tube.  $^1\text{H}$  NMR spectra of **KRS-1** was recorded in a Bruker 500 MHz NMR instrument at 25 °C. Paramagnetic susceptibility of the **KRS-1** was determined using the following equation:  $\chi_P = \chi_0 + 3000\Delta\nu/4\pi\nu_0cM$  Here,  $\chi_0$  = diamagnetic susceptibility,  $\Delta\nu$  = shift of frequency of the methyl protons of HMDS in Hz,  $\nu_0$  = frequency of the NMR instrument used during the measurement,  $c$  = concentration of the **KRS-1**, and  $M$  = molecular weight. Effective magnetic moment ( $\mu_{\text{eff}}$ ) of the **KRS-1** was determined using the following equation:  $\mu_{\text{eff}} = (3k_B\chi_P T/N_A\beta^2)^{1/2} = (8 \times \chi_P \times T)^{1/2}$  Where  $k_B$  = Boltzmann's constant,  $T$  = Temperature,  $N_A$  = Avogadro's number,  $\beta$  = Bohr magneton. The ratio of  $3k_B/N_A\beta^2 \approx 8$ . Molar paramagnetic susceptibility was estimated from the  $\chi_P$  value and molecular weight of the **KRS-1**.

### Detection of PrP<sub>106-126</sub> aggregates in neuronal HT-22 cells:

#### Cell culture and treatments

HT-22 cells were cultured in Dulbecco's Modified Eagle Medium (DMEM) medium and were maintained at 37°C in an incubator, supplied with 5% CO<sub>2</sub>. After 24 hours of incubation, the cells were trypsinized and were seeded in multi-well plates. At 60% confluency, the cells were treated with fibrillar PrP<sub>106-126</sub> with the probe (KRS-1) and proceeded according to the respective experiments.

#### MTT assay for cell viability

The cytotoxicity of the probe **KRS-1** was assessed according to the previously published protocol<sup>11</sup>.  $5 \times 10^3$  HT-22 cells were seeded in a 96-well plate, which was then incubated with test compounds for 24 hours. Thereafter, 10  $\mu\text{L}$  MTT (stock conc. 5mg/mL) was added to each well. After 4 hours of incubation, the formazan particles were dissolved in DMSO. The optical density of the solubilized, purple-colored formazan crystals was measured at 570 nm in ELSIA plate reader (Fluostar optima, BMG Labtech, Germany). The percentage inhibition was calculated as follows:

$$\frac{\text{mean absorbance of vehicle treated cells}}{\text{mean absorbance of vehicle treated cells}} \times 100$$

All data was obtained by performing three independent experiments.

## Molecular docking

Using the LANL2DZ basis set and the B3LYP level of theory, molecular structure optimization and frequency calculation of the complex were performed.<sup>12</sup> The Gaussian 16 software suite was used to perform the calculations.<sup>13</sup> Using the Autodock 4.2 program, molecular docking studies were carried out to investigate the interaction between the **KRS-1** and the fibrillar prion protein.<sup>14</sup> Since there is no PDB code for a prion protein having peptide sequence 106–126, the protein structure of the prion fibrils with PDB code 6UUR (fibrils consisting of the sequence from 94 to 178) was used, and the structure was selected from the RCSB Protein Data Bank (PDB).<sup>15</sup> For molecular docking, the PDBQT files of the ligand and protein were created using Autodock tools (ADT).<sup>14</sup> The protein binding sites and peptide sequences ranging from 106 to 126 were determined, and the molecular docking grid was created as per this information. The grid center was specified at 217.575 x 226.252 x 135.291 xyz-coordinates, respectively. For docking, we used the Lamarckian genetic algorithm (LGA) and up to 2 500 000 energy evaluations. The protein–ligand complex's docking positions and 2-D interaction plots were visualized using the Discovery Studio 9 program.

## MALDI-TOF MS

The peptide sample utilized in the MALDI-TOF MS experiments was maintained at a constant concentration of 100 µM. The peptide was incubated for 24 hours for fibrils formation. The probe **KRS-1** was added in an amount half to that of the aggregated PrP<sub>106–126</sub> sample. Prior to the experiment, the sample was incubated for 30 minutes. The 2,5-dihydroxy benzoic acid (DHB) matrix and sample were separately dissolved in TA50 solution (ACN: 0.1% TFA–H<sub>2</sub>O, V/V = 50/50). A manual aliquot of 1 µL of the sample matrix solution ( $V_{\text{peptide}}/V_{\text{matrix}} = 50/50$ ) was spotted onto the Bruker Daltonics stainless steel target plate. The sample was examined using an Ultraflextreme MALDI-TOF MS (Bruker Daltonics, Germany) after the droplet had been air-dried at ambient temperature. Each mass spectrum was acquired within a mass-to-charge ratio (m/z) range of 0–2600 in the reflectron positive mode.

## The Quantum Yield of KRS-1

[Ru(bpy)<sub>3</sub>]<sup>2+</sup>, which has a known quantum yield of **0.064** in acetonitrile solution at room temperature, was employed as a reference to determine the quantum yield of **KRS-1**. The **KRS-1** and [Ru(bpy)<sub>3</sub>](PF<sub>6</sub>)<sub>2</sub> solutions were prepared in acetonitrile with UV–Vis absorption peaks that were maintained at or below 0.1. The absorption and PL spectra were recorded at an excitation wavelength of 430 nm, and the fluorescence peak areas were measured using photoluminescence (PL) spectra. The quantum yield was determined by employing the subsequent formula:

$$QY = QY_S \times \frac{I}{I_S} \times \frac{A_S}{A} \times \frac{\eta^2}{\eta_S^2} \times 100\%$$

1. QY is the quantum yield of the **KRS-1**.
2. QY<sub>s</sub> is the quantum yield of the reference i.e., [Ru(bpy)<sub>3</sub>](PF<sub>6</sub>)<sub>2</sub>.
3. *I* and *I<sub>s</sub>* are the integral areas of the fluorescence peaks for the **KRS-1** and the reference, respectively.
4. *A* and *A<sub>s</sub>* are the absorbance values for **KRS-1** and the reference, respectively.
5. *n* are the refractive indices of the solvents.

## Supplementary Figures

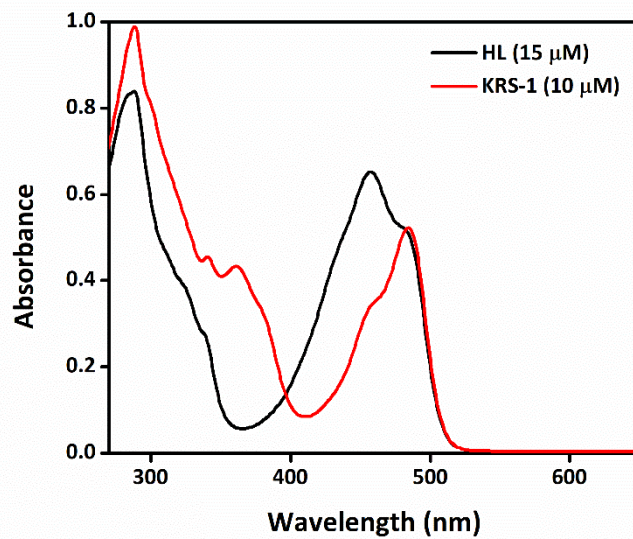

**Figure S1:** UV-Visible Absorption Spectra in DMSO (Biological Grade).

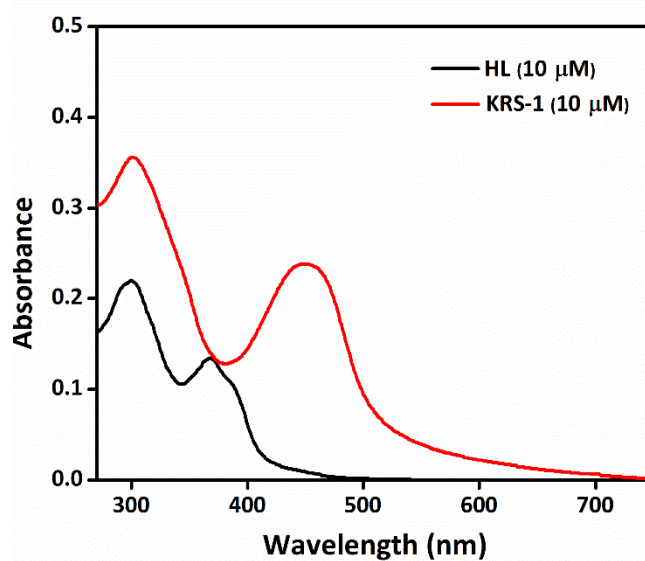

**Figure S2:** UV-Visible Absorption Spectra in PBS buffer at pH 7.4 using stock solutions prepared in biological grade DMSO.



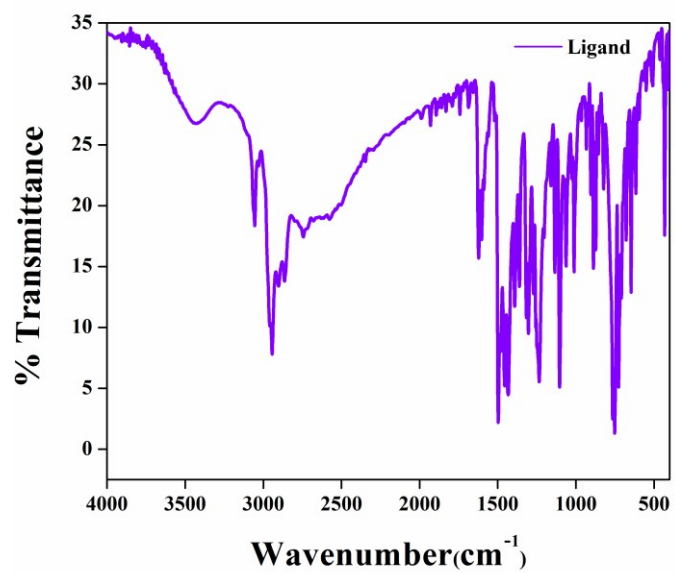

**Figure S3:** FT-IR Spectra of Ligand (HL).

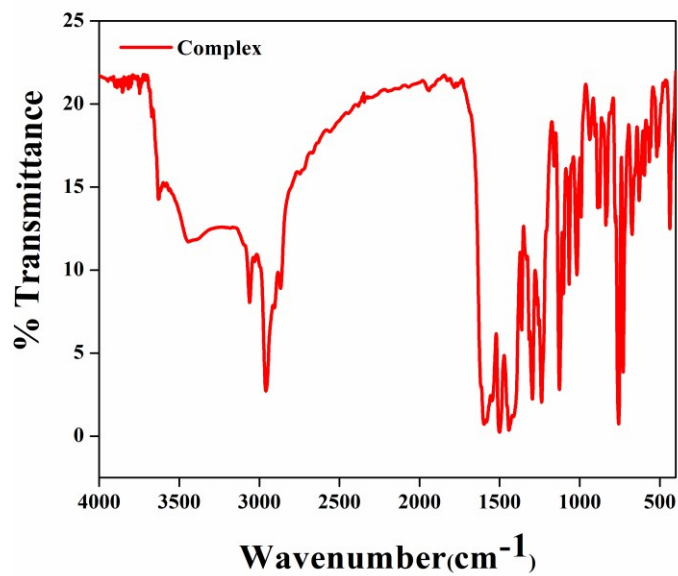

**Figure S4:** FT-IR Spectra of complex (KRS-1).

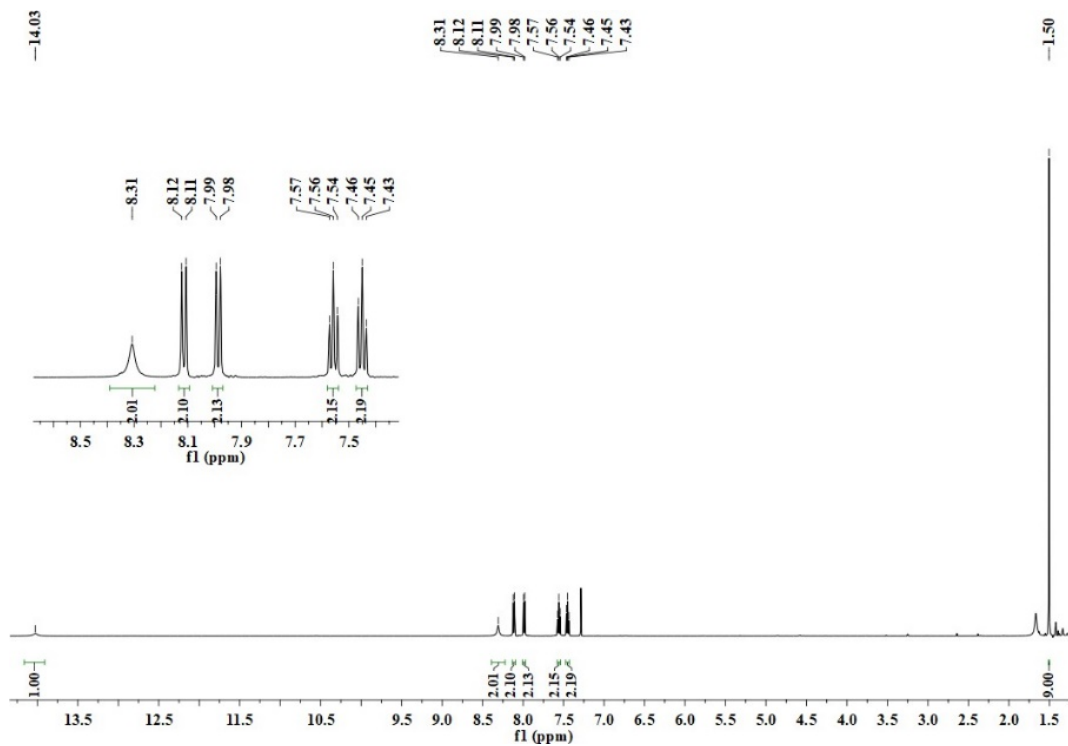

**Figure S5:**  $^1\text{H}$  NMR spectra of bis-benzothiazole Ligand (HL) in  $\text{CDCl}_3$ .

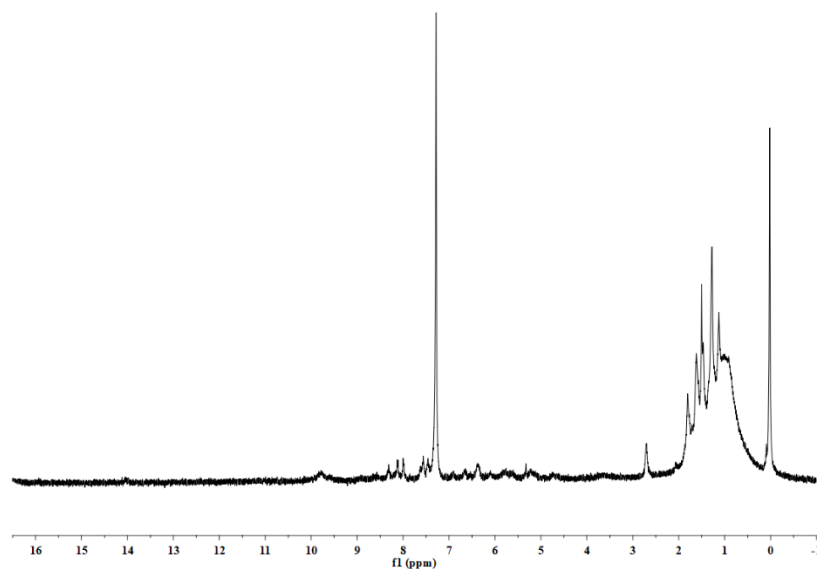

**Figure S6:**  $^1\text{H}$  NMR spectra of KRS-1 in  $\text{CDCl}_3$ .

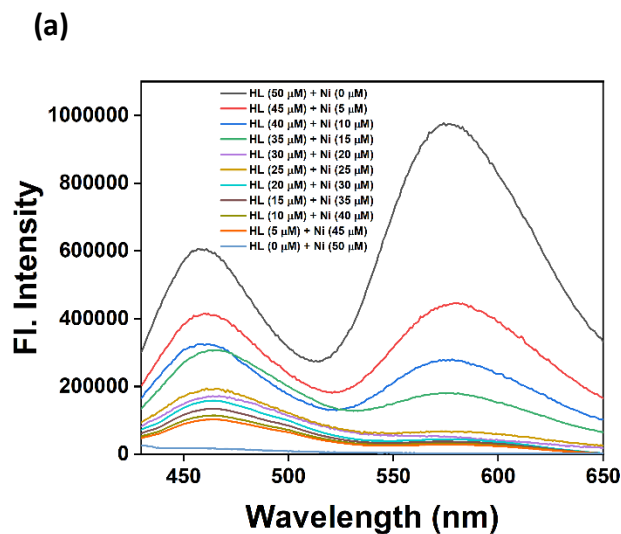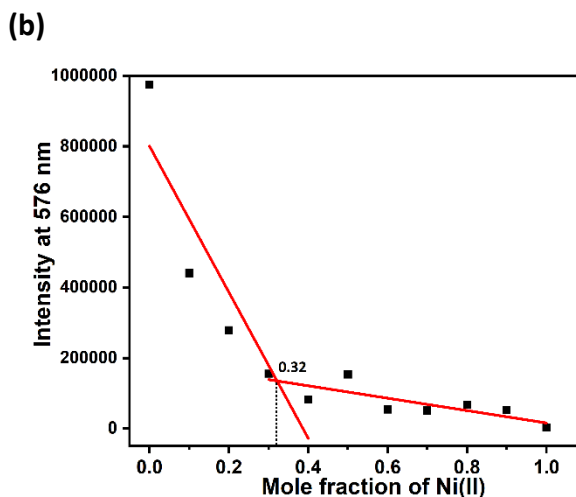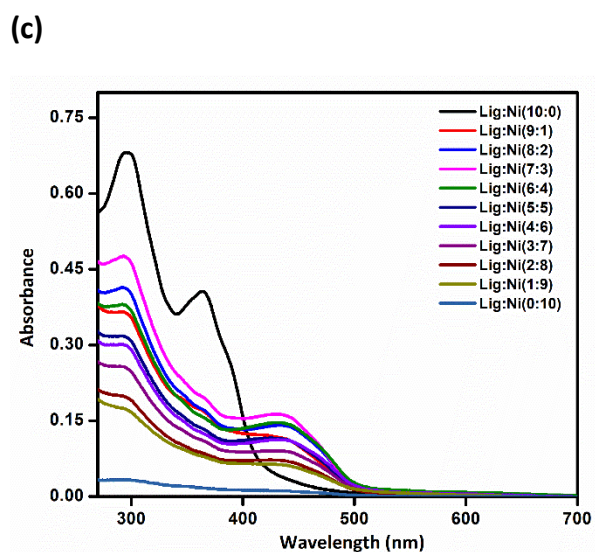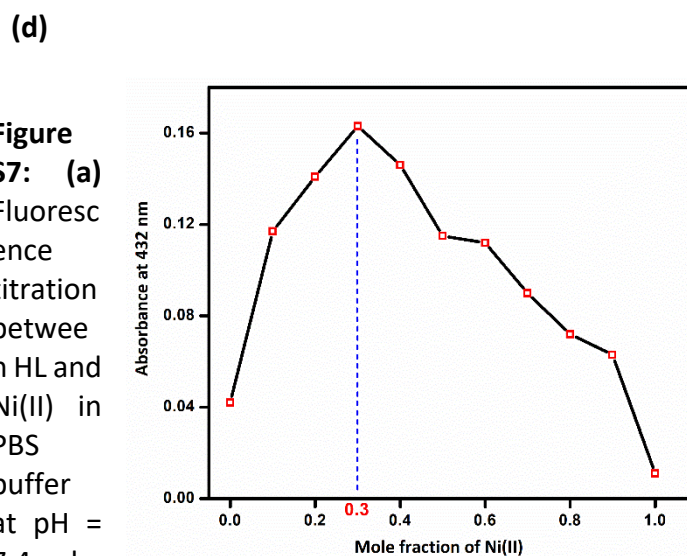

**Figure S7:** (a) Fluorescence titration between HL and Ni(II) in PBS buffer at pH = 7.4 by

keeping the total concentration of HL and Ni(II) constant at 50  $\mu\text{M}$  ( $\lambda_{\text{ex}} = 360 \text{ nm}$ ). (b) Job's plot analysis of the photoluminescence of HL in the presence of Ni(II) ions. The mole fraction of the Ni(II) and Ligand (HL) was varied, while the total concentration of the two components was kept constant at 50  $\mu\text{M}$ . The stoichiometry of binding between HL and Ni(II) was found to be **2:1**, corresponding to the mole fraction of Ni(II) **0.32** calculated using the intercept of two slopes.<sup>16</sup> (c) UV-visible titration between HL and Ni(II) in PBS buffer at pH = 7.4 by keeping the total concentration of HL and Ni(II) constant at 50  $\mu\text{M}$ . (d) The stoichiometry of binding between HL and Ni(II) was found to be **2:1**, corresponding to the mole fraction of Ni(II) 0.3 calculated by plotting the graph between the absorbance value at 432 nm and mole fraction of Ni(II).

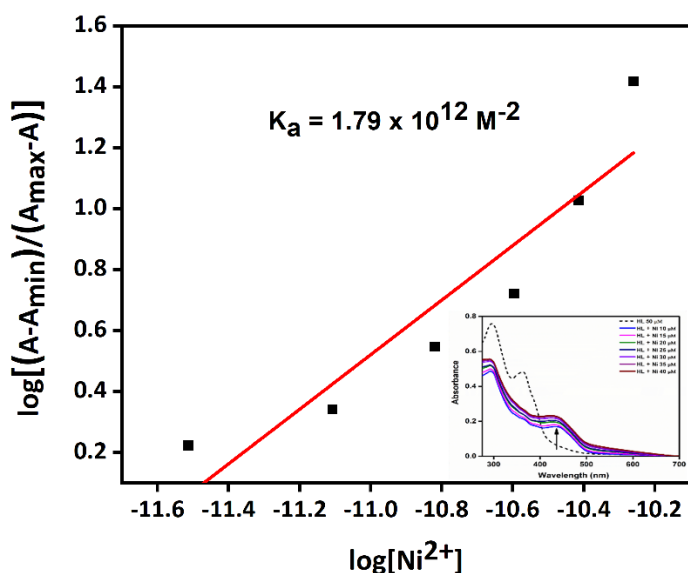

**Figure S8:** Determination of binding constant ( $K_a$ ) by Benesi–Hildebrand equation from UV-vis titration data of ligand (50  $\mu\text{M}$ ) with varying  $\text{Ni}^{2+}$  concentration in PBS buffer pH 7.4 at wavelength 432 nm (inset- UV visible titration spectra).

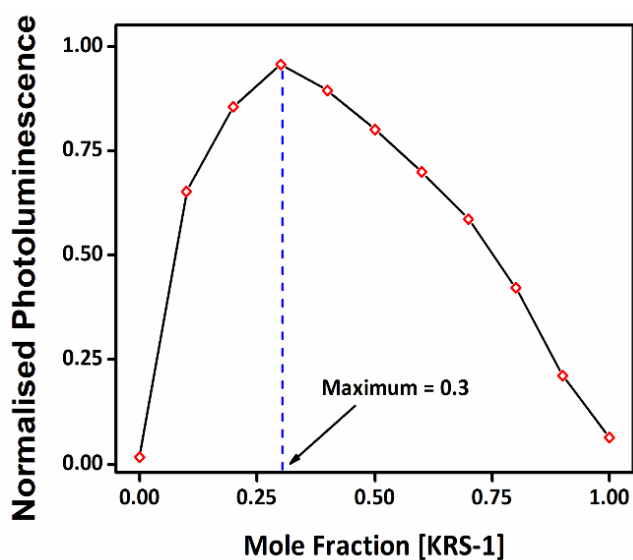

**Figure S9:** Job's plot analysis of the photoluminescence of **KRS-1** in the presence of fibrillar  $\text{PrP}_{106-126}$  aggregates. The mole fraction of the **KRS-1** and fibrillar  $\text{PrP}_{106-126}$  aggregates was varied, while the total concentration of the two components was kept constant at 100  $\mu\text{M}$ .

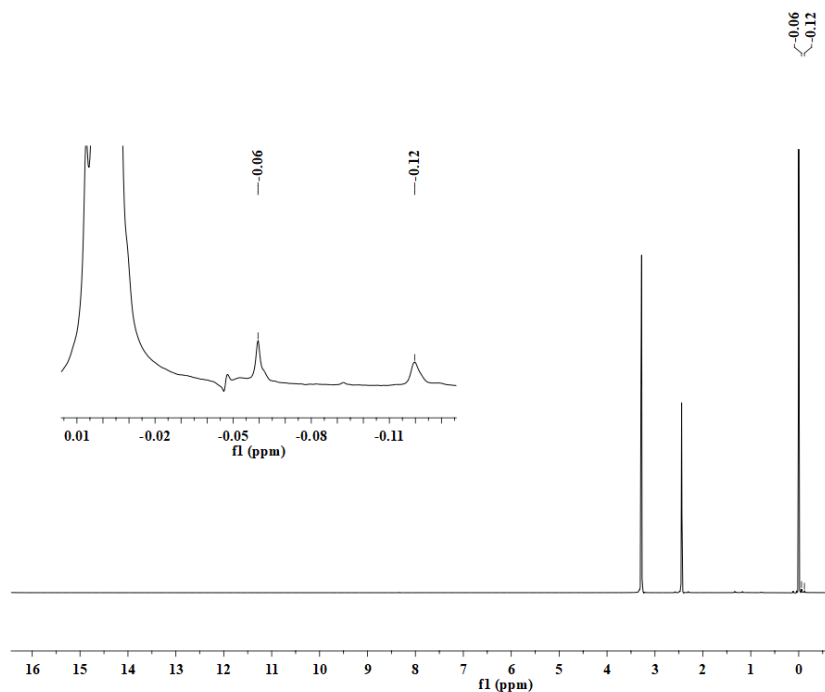

**Figure S10:** The shift of methyl protons of HMDS was observed (0.06 ppm) for **KRS-1** ( $6.15 \times 10^{-3}$  M) in  $\text{DMSO-}d_6$  at 25 °C. This shift value provides a magnetic moment value ( $\mu_{\text{eff}}$ ) of 2.61 BM.

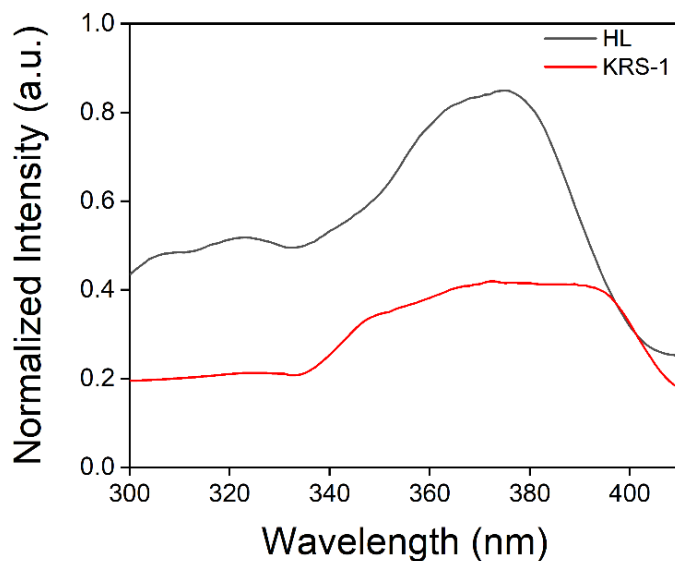

**Figure S11:** Excitation spectra of HL and **KRS-1**.  $\lambda_{\text{em}} = 576$  nm.

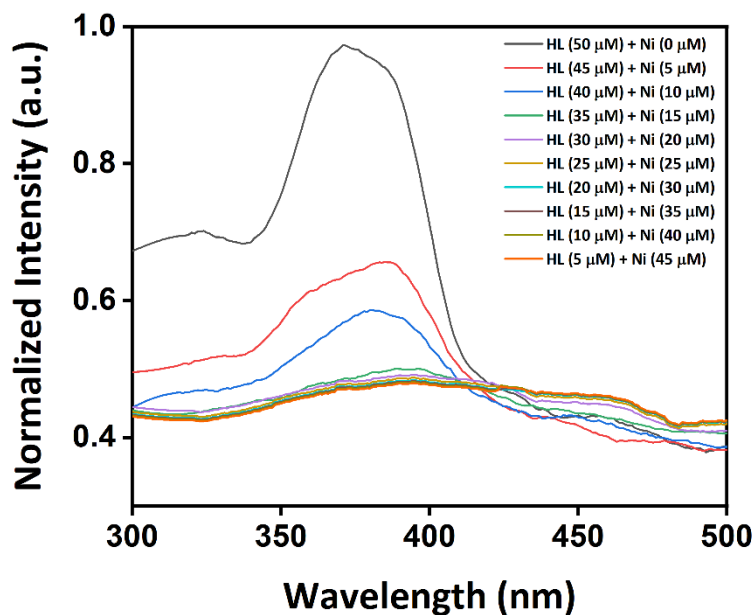

**Figure S12:** Change in excitation spectra of ligand (HL) upon addition of Ni(II) in PBS buffer of pH = 7.4.  $\lambda_{em} = 576$  nm.

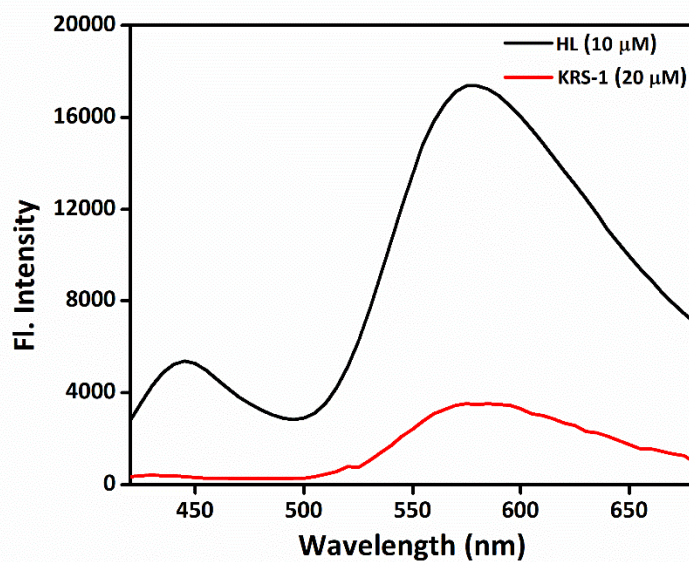

**Figure S13:** Emission spectra of HL and KRS-1 in PBS at pH = 7.4.  $\lambda_{ex} = 360$  nm.

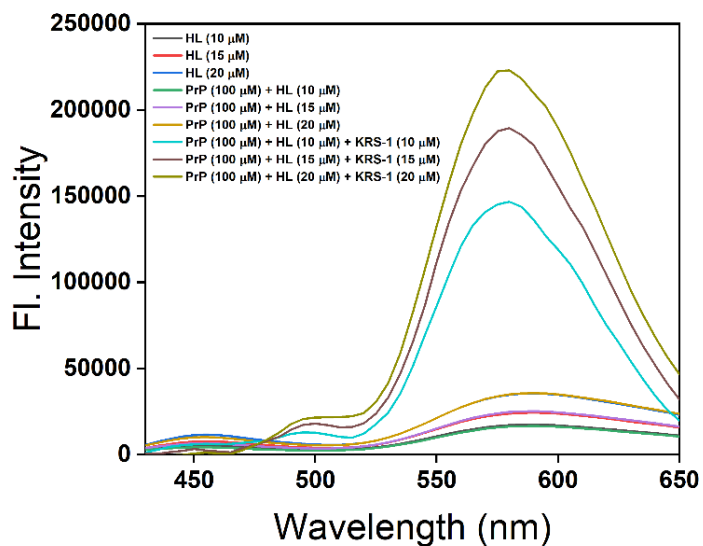

**Figure S14:** KRS-1 behavior in the presence of Ligand (HL) on treatment with fibrillar PrP<sub>106-126</sub> aggregates in PBS at pH = 7.4.  $\lambda_{\text{ex}} = 360 \text{ nm}$ .

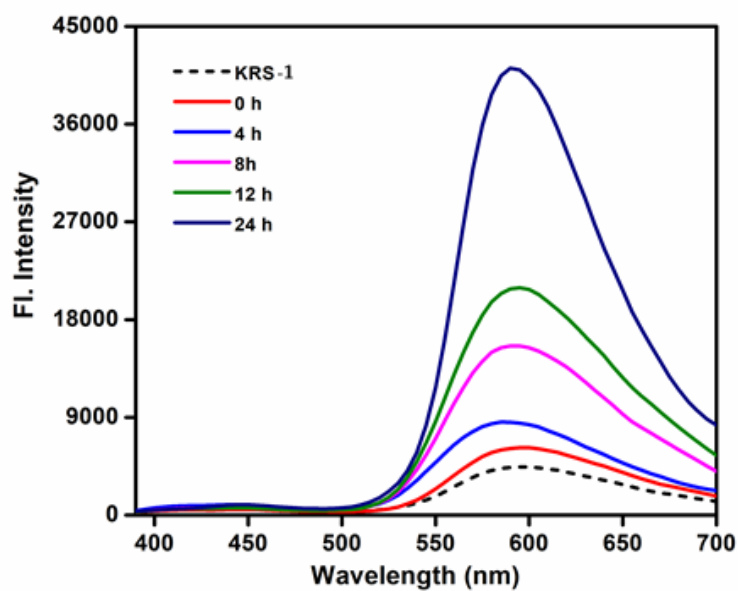

**Figure S15:** PrP<sub>106-126</sub> samples were incubated for various time intervals in the absence of KRS-1, ranging from 0, 4, 8, 12, and 24 hours in PBS at pH = 7.4.  $\lambda_{\text{ex}} = 360 \text{ nm}$ . These samples were then treated immediately with KRS-1, and fluorescence intensity was measured.

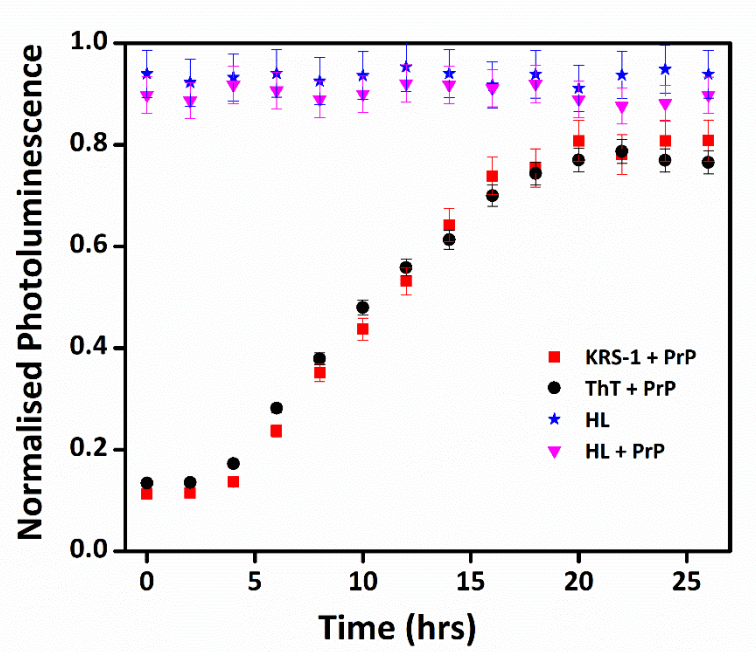

Figure S16: Control time-dependent studies of HL and KRS-1 using ThT as a standard

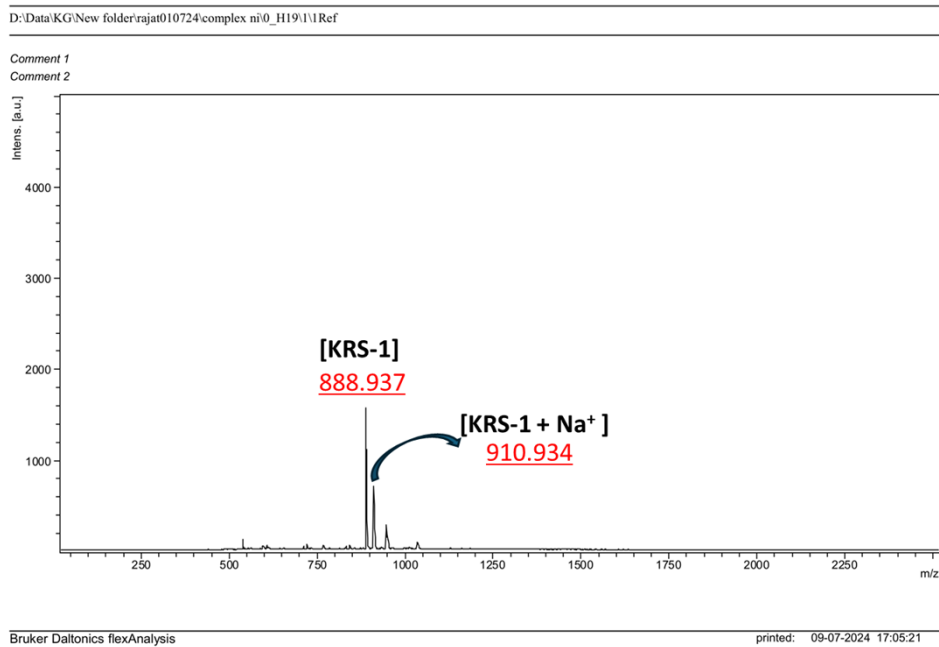

Figure S17: MALDI-TOF MS spectrum of KRS-1.



Comment 1  
Comment 2

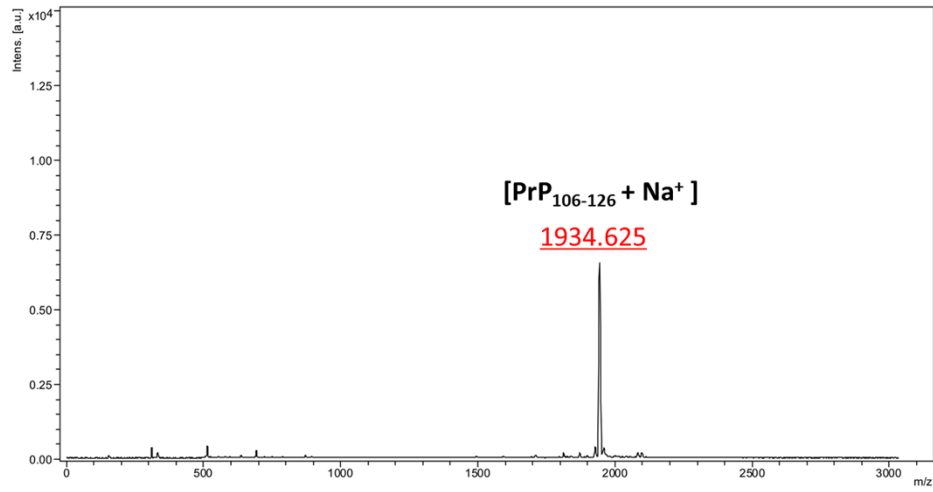

Bruker Daltonics flexAnalysis

printed: 09-07-2024 17:28:41

**Figure S18:** MALDI-TOF MS spectrum of native PrP<sub>106-126</sub> peptide.

Comment 1  
Comment 2

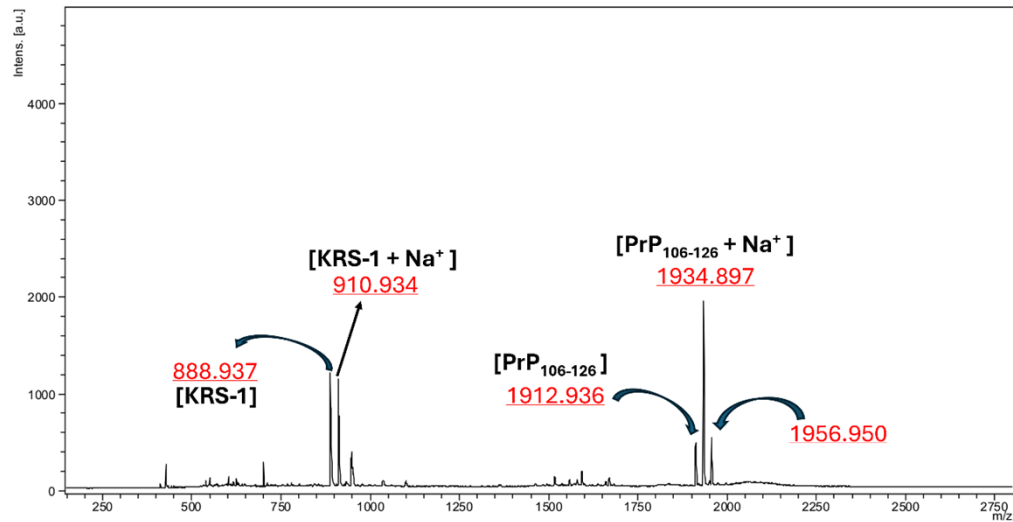

Bruker Daltonics flexAnalysis

printed: 18-07-2024 16:37:33

**Figure S19:** MALDI-TOF MS spectrum of **KRS-1** along with aggregated PrP<sub>106-126</sub> peptide (first peptide was incubated at 37 °C for 24 hrs. and then **KRS-1** was added, and the spectrum was recorded)

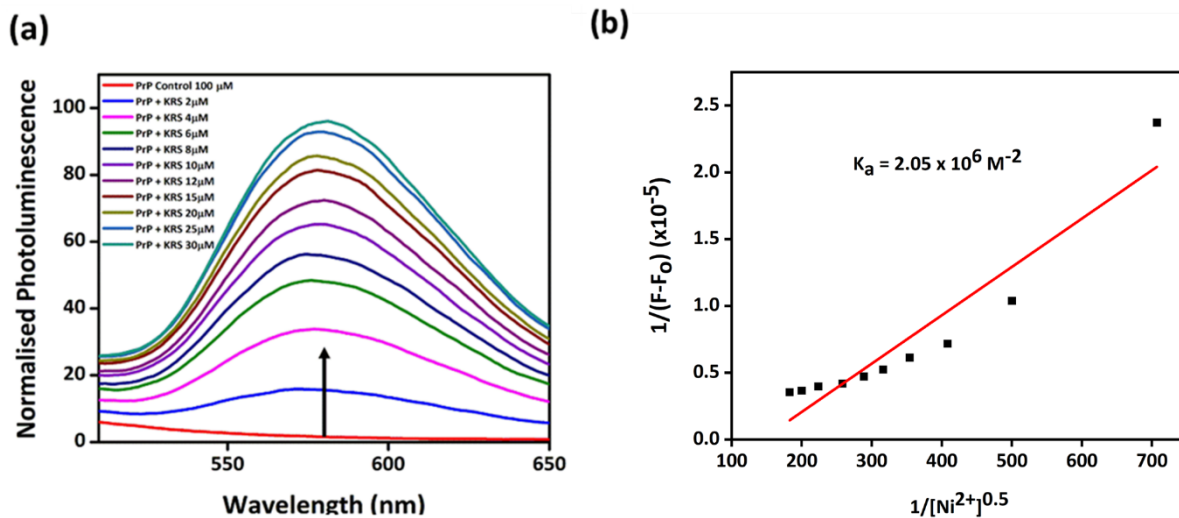

**Figure S20:** (a) Fluorescence titration curve for **KRS-1** by keeping the concentration of PrP<sub>106-126</sub> fibrils constant at 100 μM. (b) Fitting of this data to the Benesi- Hildebrand equation for calculating the binding constant ( $K_a$ ) revealed a  $K_a$  value of  $2.05 \times 10^6 \text{ M}^{-2}$  for the association of **KRS-1** to PrP<sub>106-126</sub> fibrils.

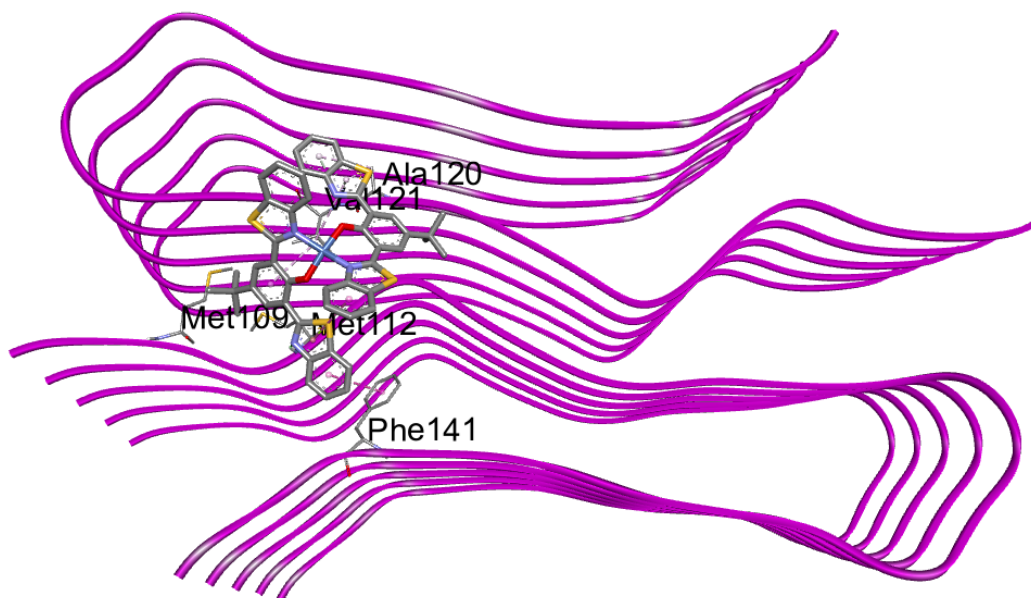

**Figure S21.** Stacking of **KRS-1** in square planar configuration between the  $\beta$ -sheets structure of prion protein fibrils.

<sup>94</sup>GTHSQW NKPSKP  
<sup>106</sup>KTNMKHMAGAAAAGAVVGLG<sup>126</sup>  
 GYMLGSAMSRPIIHFGSDYEDRYRE  
 NMHRYPNQVYYRPMDEYSNQNNFV  
 HD<sup>178</sup>

**Figure S22** The human prion protein fibril sequence of 6UUR (PDB), with prion protein fragments from 106 to 126 sequence shown in red. (The real prion sequence from 94 to 178 is indicated by superscripts).

| Name                       | Visible                                 | Color                                                                               | Parent                  | Distance | Category      | Types         | From         | From Chemistry | To         | To Chemistry |
|----------------------------|-----------------------------------------|-------------------------------------------------------------------------------------|-------------------------|----------|---------------|---------------|--------------|----------------|------------|--------------|
| 1 H:MET112:HN - d:RES1:N17 | <input checked="" type="checkbox"/> Yes |  | Ligand Non-bond Monitor | 2.33953  | Hydrogen Bond | Convention... | H:MET112:... | H-Donor        | d:RES1:... | H-Acceptor   |
| 2 J:VAL121:HN - d:RES1     | <input checked="" type="checkbox"/> Yes |  | Ligand Non-bond Monitor | 2.53429  | Hydrogen Bond | Pi-Donor H... | J:VAL121:... | H-Donor        | d:RES1     | Pi-Orbitals  |
| 3 J:VAL121:HN - d:RES1     | <input checked="" type="checkbox"/> Yes |  | Ligand Non-bond Monitor | 3.17906  | Hydrogen Bond | Pi-Donor H... | J:VAL121:... | H-Donor        | d:RES1     | Pi-Orbitals  |
| 4 H:MET112:O - d:RES1      | <input checked="" type="checkbox"/> Yes |  | Ligand Non-bond Monitor | 2.69311  | Other         | Pi-Lone Pair  | H:MET112:O   | Lone Pair      | d:RES1     | Pi-Orbitals  |
| 5 d:RES1:C7 - H:MET109     | <input checked="" type="checkbox"/> Yes |  | Ligand Non-bond Monitor | 4.37446  | Hydrophobic   | Alkyl         | d:RES1:C7    | Alkyl          | H:MET1...  | Alkyl        |
| 6 d:RES1 - J:VAL121        | <input checked="" type="checkbox"/> Yes |  | Ligand Non-bond Monitor | 5.33925  | Hydrophobic   | Pi-Alkyl      | d:RES1       | Pi-Orbitals    | J:VAL121   | Alkyl        |
| 7 d:RES1 - J:ALA120        | <input checked="" type="checkbox"/> Yes |  | Ligand Non-bond Monitor | 4.14046  | Hydrophobic   | Pi-Alkyl      | d:RES1       | Pi-Orbitals    | J:ALA120   | Alkyl        |
| 8 d:RES1 - J:VAL121        | <input checked="" type="checkbox"/> Yes |  | Ligand Non-bond Monitor | 5.32862  | Hydrophobic   | Pi-Alkyl      | d:RES1       | Pi-Orbitals    | J:VAL121   | Alkyl        |
| 9 d:RES1 - J:ALA120        | <input checked="" type="checkbox"/> Yes |  | Ligand Non-bond Monitor | 4.50628  | Hydrophobic   | Pi-Alkyl      | d:RES1       | Pi-Orbitals    | J:ALA120   | Alkyl        |

**Figure S23:** Interaction parameters between the complex and peptide.

## References:

- 1 L. F. Lindoy, G. V. Meehan and N. Svenstrup, *Synthesis*, 1998, 1029–1032.
- 2 M. Gulcan, Y. Karataş, S. Işık, G. Öztürk, E. Akbaş and E. Şahin, *J. Fluoresc.*, 2014, **24**, 1679–1686.
- 3 G. M. Sheldrick, *Acta Crystallogr. Sect. A*, 1990, **46**, 467–473.
- 4 O. V. Dolomanov, L. J. Bourhis, R. J. Gildea, J. A. K. Howard and H. Puschmann, *J. Appl. Crystallogr.*, 2009, **42**, 339–341.
- 5 C. F. Macrae, P. R. Edgington, P. McCabe, E. Pidcock, G. P. Shields, R. Taylor, M. Towler and J. Van De Streek, 2006, preprint, DOI: 10.1107/S002188980600731X.
- 6 Y. Wang, L. Feng, B. Zhang, X. Wang, C. Huang, Y. Li and W. Du, *Inorg. Chem.*, 2011, **50**, 4340–4348.
- 7 C. Y. Huang, *Methods Enzymol.*, 1982, **87**, 509–525.
- 8 Y. Li, J. Wu, X. Jin, J. Wang, S. Han, W. Wu, J. Xu, W. Liu, X. Yao and Y. Tang, *Dalton Trans.*, 2014, **43**, 1881–1887.
- 9 S. K. Sur, *J. Magn. Reson. 1969*, 1989, **82**, 169–173.
- 10 G. A. Bain and J. F. Berry, *J. Chem. Educ.*, 2008, **85**, 532–536.
- 11 V. Kumar, S. Haldar, S. Ghosh, S. Chauhan, A. Sharma, P. Dhankhar, A. Kumar, S. Jaiswal, S. Saini, S. Gupta, D. Lahiri and P. Roy, *Biochem. Pharmacol.*, DOI:10.1016/j.bcp.2022.115284.
- 12 A. D. Becke, *J. Chem. Phys.*, 1993, **98**, 5648–5652.
- 13 M. Frisch, G. Trucks, H. Schlegel, G. Scuseria, M. Robb, J. Cheeseman, G. Scalmani, V. Barone, G. Petersson, H. Nakatsuji, X. Li, M. Transport, A. Marenich, J. Bloino, B. Janesko, R. Gomperts, B. Mennucci, H. Hratchian and D. Gaussian, *Inc Wallingford CT*, 2016, **6**, 3977.
- 14 G. M. Morris, H. Ruth, W. Lindstrom, M. F. Sanner, R. K. Belew, D. S. Goodsell and A. J. Olson, *J. Comput. Chem.*, 2009, **30**, 2785–2791.
- 15 C. Glynn, M. R. Sawaya, P. Ge, M. Gallagher-Jones, C. W. Short, R. Bowman, M. Apostol, Z. H.

Zhou, D. S. Eisenberg and J. A. Rodriguez, *Nat. Struct. Mol. Biol.*, 2020, **27**, 417–423.  
16 Y. Li, L. Wang, L. Wang, B. Zhu and J. Ma, *RSC Adv.*, 2023, **13**, 33276–33287.

-:END:-
